# Supplementary material for: A 90-Day Toxicology Study of Meat from Genetically Modified Sheep Overexpressing TLR4 in Sprague-Dawley Rats
Source: PLoS One. 2015 Apr 13;10(4):e0121636. doi: 10.1371/journal.pone.0121636 (PMC4395235; doi:10.1371/journal.pone.0121636)
Supplement: S2 Dataset — (XLS) [file pone.0121636.s002.xls]

## Sheet: data
Male：	Number:
Date/group：		0W	1W	2W	3W	4W	5W	6W	7W	8W	9W	10W	11W	12W	13W
CK	35	190	246	300	334	369	394	418	419	449	460	468	475	460	474
	38	199	261	318	362	396	426	450	451	467	490	482	513	482	489
	45	208	283	357	407	448	486	524	524	541	565	560	592	562	553
	49	199	257	319	350	391	416	443	457	475	495	488	517	485	498
	67	212	277	339	377	408	444	477	464	494	509	503	537	508	530
	68	204	269	323	361	396	421	446	444	464	475	477	513	486	490
	138	187	246	307	345	377	407	438	445	465	490	517	468	496	513
	149	188	242	291	321	364	385	407	418	439	453	473	487	456	470
	159	208	277	341	384	420	454	487	487	511	527	527	553	525	530
	167	195	259	309	350	378	410	436	423	453	471	479	485	466	474
3.75% WT	1	184	237	280	302	311	329	348	351	381	382	401	406	390	384
	4	168	220	266	295	319	336	367	384	404	417	427	413	408	407
	9	184	241	297	328	364	386	427	430	444	459	455	478	437	453
	10	198	262	329	370	420	456	488	495	550	558	581	597	593	599
	18	200	261	333	374	422	454	498	507	551	559	588	599	588	616
	48	193	248	302	331	358	387	389	392	415	458	464	475	450	486
	58	205	261	303	329	356	385	406	400	425	417	432	446	423	432
	78	196	255	281	329	367	370	392	385	414	412	429	453	413	410
	135	182	243	313	327	364	386	402	396	405	405	420	427	435	479
	137	195	248	298	303	336	357	401	399	416	459	469	488	436	420
7.5% WT	5	179	229	270	294	315	337	353	365	367	375	381	401	386	393
	16	168	215	256	268	285	301	313	319	333	318	325	340	327	341
	17	198	259	320	363	352	398	426	424	449	461	470	496	472	478
	46	184	238	295	335	363	395	417	423	451	455	469	496	468	487
	123	189	233	293	332	350	378	396	405	431	437	447	474	458	456
	128	197	260	313	360	394	427	446	468	481	491	509	528	519	513
	129	191	252	322	345	375	400	419	419	439	442	448	468	450	453
	156	198	260	299	331	360	385	386	419	437	439	454	482	455	465
	157	209	273	320	347	380	409	443	456	502	519	533	564	552	563
	168	210	282	345	387	430	469	467	501	528	549	556	589	560	558
15% WT	3	187	232	294	329	360	379	401	416	435	446	443	481	476	492
	14	200	265	326	366	399	424	453	448	508	515	516	559	526	544
	15	212	279	320	355	385	411	438	487	440	469	472	503	487	490
	25	204	268	320	360	400	430	461	486	506	521	520	552	546	550
	26	169	212	271	292	324	338	365	440	369	396	393	406	375	393
	69	183	238	305	340	376	393	329	363	479	470	473	500	451	482
	79	190	248	306	340	380	391	425	408	451	464	464	499	473	502
	134	198	262	318	350	392	409	445	454	449	482	475	490	441	480
	146	201	263	317	350	388	417	449	469	463	491	485	520	505	522
	148	189	250	302	321	352	365	396	492	395	438	445	473	429	453
3.75% GM	6	192	256	317	354	410	442	471	479	517	528	516	550	549	550
	7	199	261	323	362	396	429	452	449	477	480	477	478	478	488
	24	199	260	310	345	369	393	413	414	434	437	445	446	453	454
	27	203	265	326	355	404	450	479	464	517	532	550	559	548	560
	28	210	278	347	385	421	452	480	480	491	515	520	525	532	533
	37	191	251	304	324	358	381	397	412	422	422	416	447	448	455
	47	181	239	296	330	367	401	430	429	465	473	457	485	479	483
	127	203	268	330	372	416	437	457	479	481	499	516	515	503	513
	139	177	226	272	300	327	338	352	359	361	364	353	370	365	368
	145	193	250	315	358	401	428	461	452	482	495	488	518	527	533
7.5% GM	2	202	270	323	365	403	432	449	464	489	513	493	554	534	546
	8	192	254	315	357	400	435	456	462	500	511	482	549	536	552
	19	192	253	316	350	393	425	452	446	470	497	491	514	502	510
	29	208	277	344	380	420	434	469	459	473	481	463	498	491	510
	34	201	266	321	358	395	416	450	448	477	483	473	514	500	506
	56	179	230	275	302	331	352	354	374	380	371	332	389	391	400
	59	185	249	306	333	365	392	409	422	435	452	463	484	464	470
	125	198	261	334	378	410	440	484	485	525	536	528	583	574	588
	126	201	264	334	375	413	441	477	478	502	535	519	566	552	567
	147	208	273	349	393	437	467	504	503	532	551	537	592	582	607
15% GM	12	188	245	278	310	332	353	374	361	383	402	384	422	379	414
	13	199	264	313	350	389	419	442	444	479	481	468	511	486	527
	23	201	263	312	340	372	391	408	408	431	447	436	472	459	465
	36	204	268	317	353	381	403	424	418	460	462	450	486	469	472
	39	172	216	252	278	297	315	328	330	357	370	360	398	361	390
	57	211	280	326	360	388	407	424	430	457	464	454	483	468	472
	89	199	263	323	360	404	434	451	450	490	508	507	551	532	543
	124	198	259	313	349	379	411	435	434	461	471	449	489	473	488
	136	184	245	299	330	361	379	397	401	420	414	400	435	395	430
	158	202	278	306	338	367	393	418	406	431	459	450	496	454	476
Female：
Date/group：
CK	Number：	41381	41388	41395	41401	41408	41415	41422	41429	41436	41443	41450	41457	41464	41471
	1	157	194	196	214	223	289	252	317	327	262	280	278	266	271
	6	136	162	227	247	274	239	313	253	260	336	346	352	342	336
	7	148	178	192	209	226	251	256	254	275	250	279	273	267	253
	8	154	188	202	222	239	265	270	286	283	285	289	286	275	282
	9	146	180	216	236	247	258	286	265	288	293	304	289	298	294
	15	129	153	213	228	247	213	268	218	222	295	299	303	290	286
	19	139	169	178	195	204	232	218	260	287	210	233	239	227	231
	26	150	183	196	214	220	249	252	275	293	279	282	288	277	278
	35	157	181	209	221	240	247	264	257	266	301	303	297	294	298
	135	146	176	204	221	234	248	258	264	276	273	280	284	268	268
3.75% WT	13	135	168	200	206	230	225	250	242	251	250	254	258	250	240
	24	144	175	190	203	226	215	243	255	247	252	254	264	247	255
	27	150	180	195	204	223	241	237	241	263	249	252	277	256	253
	39	151	185	199	222	241	271	254	285	292	261	270	273	256	250
	56	172	216	210	230	237	304	281	314	360	294	300	290	280	280
	123	137	166	248	276	297	228	323	254	262	348	350	364	344	338
	128	155	191	193	216	222	247	250	269	270	266	270	285	271	268
	139	145	173	215	234	241	232	275	248	245	290	257	295	283	287
	147	144	177	198	208	256	224	247	251	263	253	295	256	240	238
	158	148	181	200	213	227	241	254	262	271	259	263	267	259	267
7.5% WT	14	155	192	223	250	250	258	286	266	254	305	307	310	304	298
	23	145	183	220	241	241	226	271	245	281	300	304	293	274	266
	29	143	184	209	221	221	220	253	264	295	277	276	287	278	278
	59	156	202	206	217	208	246	253	284	295	285	271	292	282	285
	69	161	195	229	230	230	286	284	292	317	305	290	322	298	302
	124	138	168	223	271	271	209	299	234	249	320	325	331	318	314
	126	151	187	189	201	201	277	232	289	324	252	242	267	262	264
	134	145	172	192	266	266	234	292	242	248	323	327	329	310	312
	148	143	175	220	228	228	215	249	244	259	244	253	266	257	239
	149	149	185	199	202	202	243	247	263	281	264	254	268	255	255
15% WT	2	170	217	235	246	269	303	290	319	315	303	321	329	321	306
	17	159	199	247	262	292	260	312	280	270	318	332	334	315	310
	18	143	177	226	231	251	218	269	234	242	288	297	306	289	291
	36	146	176	192	201	208	235	236	243	262	242	250	246	233	194
	49	143	175	192	216	230	235	256	252	259	264	276	271	262	266
	79	137	167	199	208	223	227	268	233	243	269	277	286	258	260
	125	135	162	185	203	216	259	239	261	275	236	245	252	234	242
	129	147	181	199	225	245	253	271	268	268	278	284	289	270	274
	156	149	179	209	231	245	224	264	242	249	271	278	288	279	275
	159	149	184	199	213	217	249	240	263	268	247	253	246	242	248
3.75% GM	5	148	180	194	202	218	215	250	226	260	253	252	251	245	235
	16	158	195	201	205	222	268	233	280	343	256	255	270	236	237
	25	138	167	227	240	282	252	295	267	285	331	325	325	300	293
	37	151	189	192	216	236	274	254	281	296	278	276	282	266	265
	38	143	175	222	237	258	230	283	250	263	288	297	301	289	285
	47	157	197	199	206	218	250	249	263	305	262	272	275	264	260
	48	138	169	212	231	253	229	276	244	268	297	300	312	287	285
	57	142	179	192	204	218	264	242	280	291	261	267	270	261	257
	136	158	191	214	232	248	231	283	240	297	295	314	314	310	305
	137	148	182	212	221	241	243	255	256	286	276	278	285	269	255
7.5% GM	4	143	175	186	193	215	244	229	261	268	240	233	230	221	226
	12	142	178	200	214	232	252	255	276	272	275	278	287	279	277
	28	150	181	206	229	239	227	268	248	247	275	284	282	281	271
	34	147	180	204	220	230	246	240	242	269	252	247	262	248	244
	45	158	191	201	224	234	250	259	282	293	268	275	279	264	268
	46	142	176	219	235	253	247	280	262	263	294	298	311	284	297
	78	157	191	202	225	239	245	260	261	266	268	272	273	273	265
	138	152	186	216	224	246	241	262	263	271	274	285	299	289	280
	145	141	178	216	229	246	246	273	261	260	289	287	312	284	286
	157	147	180	206	212	234	241	256	259	265	259	255	269	261	252
15% GM	3	143	175	177	191	202	224	210	235	239	220	170	187	198	209
	10	156	188	195	209	216	231	230	262	282	240	248	254	245	240
	58	164	205	212	225	230	268	262	308	323	293	300	302	301	289
	67	149	185	244	265	264	236	300	249	260	324	330	328	318	306
	68	138	165	213	223	227	204	248	222	229	265	273	274	263	260
	89	150	186	178	189	196	236	210	254	285	226	233	242	236	231
	127	145	170	213	239	239	213	266	237	249	283	290	293	273	276
	146	138	171	202	215	201	239	242	252	263	267	270	276	269	264
	167	144	168	199	212	228	216	243	228	255	256	265	269	257	209
	168	146	178	197	216	217	227	244	246	260	253	258	263	250	255

## Sheet: female body weight
Mean
	0	1	2	3	4	5	6	7	8	9	10	11	12	13
CD	146.059	176.522	203.3	220.7	235.4	248.995	263.7	264.648	277.68	278.4	289.5	288.9	280.4	279.7
3.75% WT	148.075	181.249	204.8	221.2	240	242.969	261.4	261.945	272.51	272.2	276.5	282.9	268.6	267.6
7.5% WT	148.571	184.258	211	232.7	231.8	241.373	266.6	262.245	280.203	287.5	284.9	296.5	283.8	281.3
15% WT	147.763	181.605	208.3	223.6	239.6	246.399	264.5	259.395	265.227	271.6	281.3	284.7	270.3	266.6
3.75% GM	148.09	182.39	206.5	219.4	239.4	245.364	262	258.627	289.36	279.7	283.6	288.5	272.7	267.7
7.5% GM	147.918	181.544	205.6	220.5	236.8	243.941	258.2	261.458	267.45	269.4	271.4	280.4	268.4	266.6
15% GM	147.23	178.94	203	218.4	222	229.425	245.5	249.295	264.567	262.7	263.7	268.8	261	253.9
SD
CD	9.22049	12.1385	13.8488	14.4072	19.0333	20.013	24.5857	25.315	26.702	33.5731	28.3127	28.1679	29.4664	27.9962
3.75% WT	10.3511	14.4484	16.9234	22.0394	22.593	26.4857	25.5482	22.4105	33.7317	31.0619	30.8338	31.3845	29.9414	29.4513
7.5% WT	7.49133	11.1109	14.2829	23.0675	24.1684	27.3168	22.9879	22.1064	29.282	27.7018	30.4501	25.4176	22.6608	25.294
15% WT	10.2758	15.7328	20.7045	19.5403	26.3152	24.8885	23.8432	25.8293	21.0476	26.3784	28.9753	31.8505	31.1343	34.0301
3.75% GM	7.72521	10.3945	12.6513	14.7889	21.3708	19.3714	20.6398	18.7378	24.1797	24.0095	24.5003	23.6138	23.5516	23.5327
7.5% GM	6.14	5.76399	9.7091	11.8814	10.5494	7.09214	14.9354	11.7153	11.4148	16.1672	20.2496	24.4777	20.9242	21.0407
15% GM	7.90576	12.1285	19.3793	22.167	20.4287	17.5308	26.7717	24.1836	26.694	31.5103	42.8617	37.9087	33.4132	32.1885

## Sheet: male body weight
Mean
	0	1	2	3	4	5	6	7	8	9	10	11	12	13
CD	199.148	261.83	320.375	359.125	394.75	424.172	452.625	453.208	474.792	493.5	497.375	514	492.625	502.125
3.75% WT	190.475	247.606	300.222	328.778	361.667	384.611	411.778	413.852	440.519	452.556	466.556	478.222	457.333	468.556
7.5% WT	192.382	250.036	303.3	336.2	360.4	389.975	406.6	419.783	441.767	448.6	459.2	483.8	464.7	470.7
15% WT	193.273	251.755	307.9	340.3	375.6	395.725	416.2	446.183	449.633	469.2	468.6	498.3	470.9	490.8
3.75% GM	194.773	255.355	314	348.5	386.9	414.988	439.2	441.65	464.633	474.5	473.8	489.3	488.2	493.7
7.5% GM	196.536	259.727	321.7	359.1	396.7	423.387	450.4	454.017	478.3	493	478.1	524.3	512.6	525.6
15% GM	195.8	258.1	303.9	336.8	367	390.45	410.1	408.233	436.767	447.8	435.8	474.3	447.6	467.7
SD
CD	8.85792	14.1617	20.2621	25.1932	25.5497	29.9873	34.649	32.7023	31.2669	33.5261	29.3011	38.3778	32.3505	28.3923
3.75% WT	10.8671	13.1703	21.2001	26.3808	36.8341	42.6381	47.9577	50.0094	60.2066	61.3517	65.5384	68.8091	72.2686	79.9064
7.5% WT	12.9579	21.0112	26.4157	34.2176	40.142	46.0265	46.3494	51.2873	58.1206	66.4767	68.2606	72.7504	70.8881	68.0442
15% WT	12.309	19.8514	16.3534	21.8228	23.8896	28.6779	43.055	41.1659	43.9263	36.9949	36.7853	42.9368	49.8563	45.4894
3.75% GM	10.1182	14.8174	20.5047	24.8026	30.2892	36.2565	41.3274	38.7943	47.613	52.9512	58.4614	57.1004	56.8991	57.7813
7.5% GM	9.53255	13.7395	21.2187	26.3753	29.8107	31.4639	42.2932	36.0369	44.5067	52.2026	57.603	59.7161	56.7944	60.6304
15% GM	11.1906	18.7166	22.7276	25.5943	31.305	34.6674	36.4827	37.4188	41.8832	41.0252	43.1092	45.0137	52.9784	47.2042

## Sheet: body weight
Mean body weight（Female）
	0W	1W	2W	3W	4W	5W	6W	7W	8W	9W	10W	11W	12W	13W
CD	146.059	176.522	203.3	220.7	235.4	248.995	263.7	264.648	277.68	278.4	289.5	288.9	280.4	279.7
3.75% WT	148.075	181.249	204.8	221.2	240	242.969	261.4	261.945	272.51	272.2	276.5	282.9	268.6	267.6
7.5% WT	148.571	184.258	211	232.7	231.8	241.373	266.6	262.245	280.203	287.5	284.9	296.5	283.8	281.3
15% WT	147.763	181.605	208.3	223.6	239.6	246.399	264.5	259.395	265.227	271.6	281.3	284.7	270.3	266.6
3.75% GM	148.09	182.39	206.5	219.4	239.4	245.364	262	258.627	289.36	279.7	283.6	288.5	272.7	267.7
7.5% GM	147.918	181.544	205.6	220.5	236.8	243.941	258.2	261.458	267.45	269.4	271.4	280.4	268.4	266.6
15% GM	147.23	178.94	203	218.4	222	229.425	245.5	249.295	264.567	262.7	263.7	268.8	261	253.9
SD（Female）
CD	9.22049	12.1385	13.8488	14.4072	19.0333	20.013	24.5857	25.315	26.702	33.5731	28.3127	28.1679	29.4664	27.9962
3.75% NT	10.3511	14.4484	16.9234	22.0394	22.593	26.4857	25.5482	22.4105	33.7317	31.0619	30.8338	31.3845	29.9414	29.4513
7.5% NT	7.49133	11.1109	14.2829	23.0675	24.1684	27.3168	22.9879	22.1064	29.282	27.7018	30.4501	25.4176	22.6608	25.294
15% NT	10.2758	15.7328	20.7045	19.5403	26.3152	24.8885	23.8432	25.8293	21.0476	26.3784	28.9753	31.8505	31.1343	34.0301
3.75% GM	7.72521	10.3945	12.6513	14.7889	21.3708	19.3714	20.6398	18.7378	24.1797	24.0095	24.5003	23.6138	23.5516	23.5327
7.5% GM	6.14	5.76399	9.7091	11.8814	10.5494	7.09214	14.9354	11.7153	11.4148	16.1672	20.2496	24.4777	20.9242	21.0407
15% GM	7.90576	12.1285	19.3793	22.167	20.4287	17.5308	26.7717	24.1836	26.694	31.5103	42.8617	37.9087	33.4132	32.1885
Mean body weight (Male)
CD	199.148	261.83	320.375	359.125	394.75	424.172	452.625	453.208	474.792	493.5	497.375	514	492.625	502.125
3.75% NT	190.475	247.606	300.222	328.778	361.667	384.611	411.778	413.852	440.519	452.556	466.556	478.222	457.333	468.556
7.5% NT	192.382	250.036	303.3	336.2	360.4	389.975	406.6	419.783	441.767	448.6	459.2	483.8	464.7	470.7
15% NT	193.273	251.755	307.9	340.3	375.6	395.725	416.2	446.183	449.633	469.2	468.6	498.3	470.9	490.8
3.75% GM	194.773	255.355	314	348.5	386.9	414.988	439.2	441.65	464.633	474.5	473.8	489.3	488.2	493.7
7.5% GM	196.536	259.727	321.7	359.1	396.7	423.387	450.4	454.017	478.3	493	478.1	524.3	512.6	525.6
15% GM	195.8	258.1	303.9	336.8	367	390.45	410.1	408.233	436.767	447.8	435.8	474.3	447.6	467.7
SD（Male）
CD	8.85792	14.1617	20.2621	25.1932	25.5497	29.9873	34.649	32.7023	31.2669	33.5261	29.3011	38.3778	32.3505	28.3923
3.75% NT	10.8671	13.1703	21.2001	26.3808	36.8341	42.6381	47.9577	50.0094	60.2066	61.3517	65.5384	68.8091	72.2686	79.9064
7.5% NT	12.9579	21.0112	26.4157	34.2176	40.142	46.0265	46.3494	51.2873	58.1206	66.4767	68.2606	72.7504	70.8881	68.0442
15% NT	12.309	19.8514	16.3534	21.8228	23.8896	28.6779	43.055	41.1659	43.9263	36.9949	36.7853	42.9368	49.8563	45.4894
3.75% GM	10.1182	14.8174	20.5047	24.8026	30.2892	36.2565	41.3274	38.7943	47.613	52.9512	58.4614	57.1004	56.8991	57.7813
7.5% GM	9.53255	13.7395	21.2187	26.3753	29.8107	31.4639	42.2932	36.0369	44.5067	52.2026	57.603	59.7161	56.7944	60.6304
15% GM	11.1906	18.7166	22.7276	25.5943	31.305	34.6674	36.4827	37.4188	41.8832	41.0252	43.1092	45.0137	52.9784	47.2042
